# Supplementary material for: Lattice expansion of MnO induced by sulphur doping for enhanced aqueous zinc-ion diffusion and storage
Source: Royal Society of Chemistry journal article supplement (doi:10.1039/d4cc04773g), 2024-01-01
Supplement: d4cc04773g1.pdf [file d4cc04773g1.pdf]

## Electronic Supplementary Information

### **Lattice Expansion of MnO Induced by Sulphur Doping for Enhanced Aqueous Zinc-Ion Diffusion and Storage**

Zixiang Cui,<sup>a</sup> Luwei Shi,<sup>a</sup> Yan Lin,<sup>b</sup> Shiliu Yang,<sup>c</sup> Zhengyi Wu,<sup>a</sup> Tao Hu,<sup>b</sup> Ulla Lassi,<sup>\*b</sup> and Ruguang Ma <sup>\*a</sup>

<sup>a</sup> School of Materials Science and Engineering, Suzhou University of Science and Technology, Suzhou 215009, China

<sup>b</sup> Research Unit of Sustainable Chemistry, University of Oulu, Oulu 90570, Finland

<sup>c</sup> School of Chemistry and Materials Engineering, New Energy Materials and Technology Research Centre, Huainan Normal University, Huainan 232038, Anhui, China

#### **Material synthesis**

##### 1.1 MnO

First, 1225 mg of  $\text{Mn}(\text{CH}_3\text{COO})_2 \cdot 4\text{H}_2\text{O}$  and 300 mg of PVP were uniformly dissolved in a mixture of ethanol/water (125/125 mL), labeled as solution **A**. Then, 1350 mg of  $\text{H}_3\text{BTC}$  was uniformly dissolved in a mixture of ethanol/water (125/125 mL), labeled as solution **B**. Solution **B** was slowly added dropwise to solution **A** and stirred continuously for 30 min to obtain solution **C**. Solution **C** was left to stand for 24 h at 60 °C, centrifuged, washed, and dried to obtain Mn-BTC precursor. The Mn-BTC precursor was then heated to 700 °C in an argon atmosphere at a heating rate of 5 °C  $\text{min}^{-1}$  for 3 h to obtain MnO material.

##### 1.2 $\text{MnOS}_{0.3}$

After the synthesis of MnO, a certain mass of sulfur powder was weighed based on the molar ratio and mixed with the MnO powder. The mixture was ground for 30 min. Then, the mixed powder was placed in a tube furnace and heated to 400 °C in an argon atmosphere at a heating rate of 5 °C  $\text{min}^{-1}$  for 2 hours to obtain  $\text{MnOS}_{0.3}$  material.

##### 1.3 $\text{MnOS}_{0.3}@\text{rGO}$

During the synthesis of the Mn-BTC precursor, 100 mg of GO was added to solution **A** and stirred continuously for 30 min to obtain solution **C**. Solution **C** was left to stand for 24 h at 60 °C, centrifuged, washed, and dried to obtain Mn-BTC@GO precursor. The Mn-BTC@GO precursor was then heated to 700 °C in an argon

atmosphere at a heating rate of 5 °C min<sup>-1</sup> for 3 h to obtain MnO@rGO material. After the synthesis of MnO@rGO, a certain mass of sulfur powder was weighed based on the molar ratio and mixed with the MnO@rGO powder. The mixture was ground for 30 min. Then, the mixed powder was placed in a tube furnace and heated to 400 °C in an argon atmosphere at a heating rate of 5 °C min<sup>-1</sup> for 2 hours to obtain MnOS<sub>0.3</sub>@rGO material.

### **Equipment used for testing and testing conditions:**

Morphological and microstructural information of the samples were obtained using a field emission scanning microscope (FESEM, JSM-IT800, Japan), and transmission electron microscope (TEM, FEI Tecnai G2 F20, America). The elemental distributions were recorded using an energy-dispersive spectrometer (EDS) connected to a TEM (Hitachi HF5000, Japan). The crystal structure information of samples was obtained by X-ray diffractometer (XRD, Bruker D8A A25, Germany) with a Cu K $\alpha$  source ( $\lambda=1.5418$  Å). The chemical composition and electronic structure of the samples were analyzed by X-ray photoelectron spectroscopy (XPS, Thermo Scientific ESCALAB Xi+, America) with a monochromatic Al anode X-ray source. The elemental content of the samples was measured by an elemental analyzer (Elementar Unicube, Germany). LANHE CT3002A battery test systems (Wuhan, China). CHI 760E electrochemical workstation. Horiba LabRAM Evolution Laser (Raman), wavelength: 532nm (2.33eV) Acquisition time: 10s Accumulation: 1. The nitrogen adsorption-desorption isotherm curves of the samples were measured by Autosorb-iQ automatic specific surface and pore size distribution analyzer (Quantachrome, America). The Quenched Solid Density Functional Theory (QSDFT) mode was chosen to analyze the pore diameter, pore type, and pore volume of the samples. TG2 (GC301 METTLER TOLEDO).

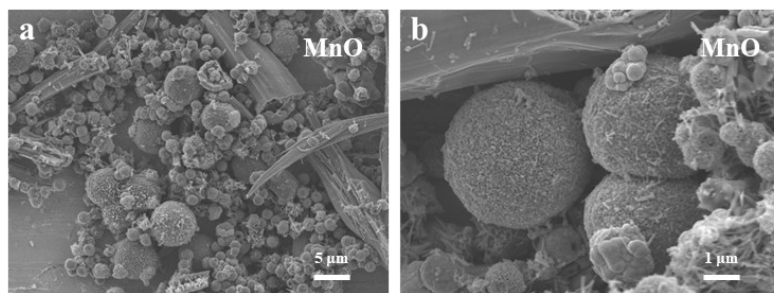

Fig. S1 SEM and enlarged SEM images of MnO.

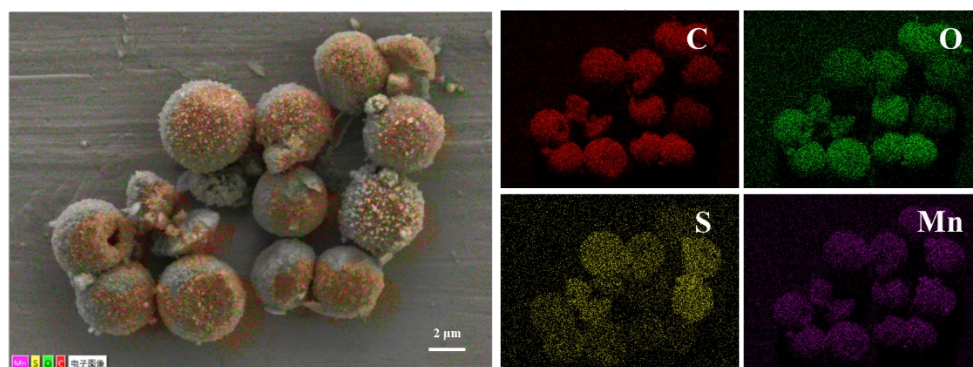

Fig. S2 Elemental mapping images of MnOS<sub>0.3</sub>.

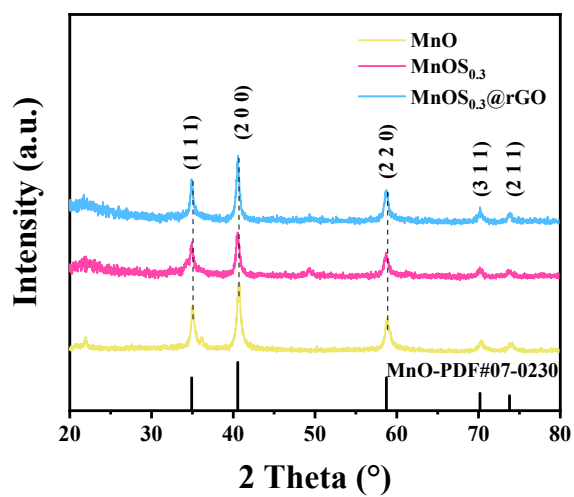

Fig. S3 XRD patterns of MnO, MnOS<sub>0.3</sub>, and MnOS<sub>0.3</sub>@rGO.

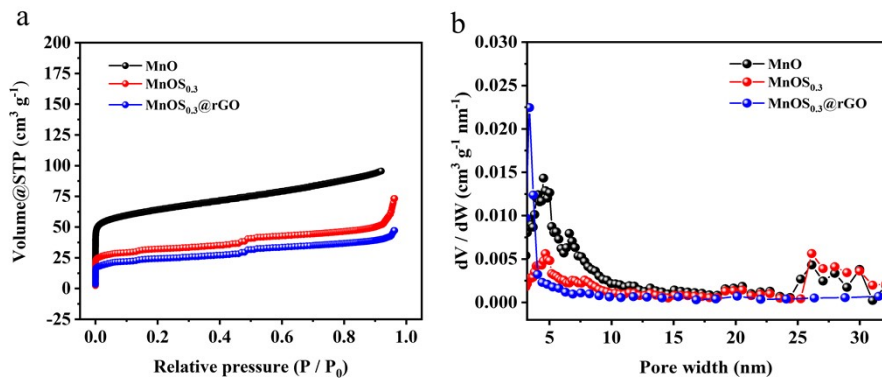

**Fig. S4** Nitrogen sorption isotherms and pore size distribution of MnO, MnOS<sub>0.3</sub> and MnOS<sub>0.3</sub>@rGO.

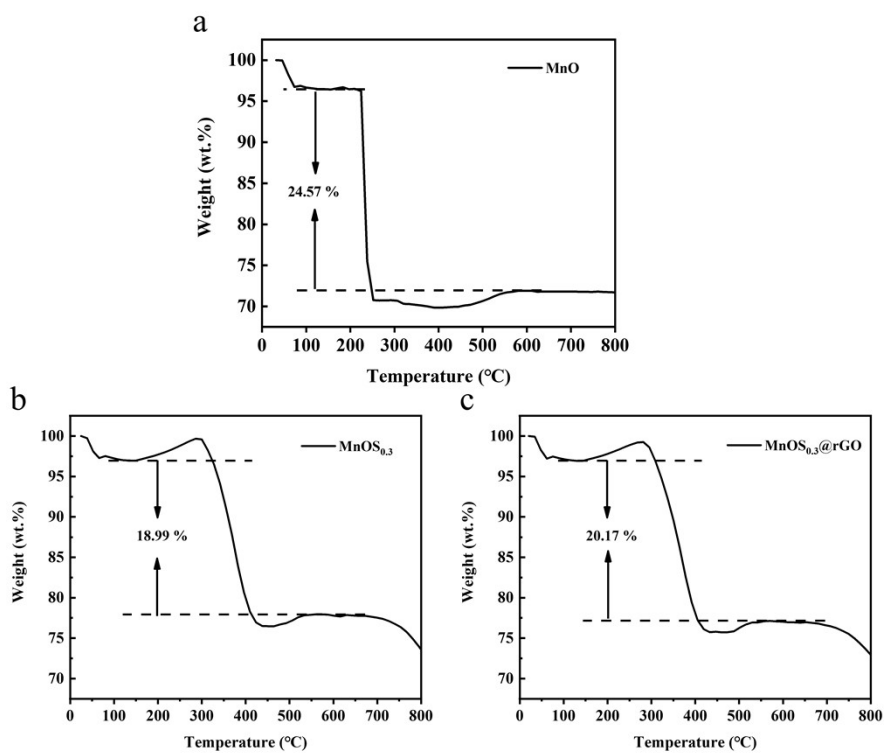

**Fig. 5** TG curve of the precursor in O<sub>2</sub> atmosphere.

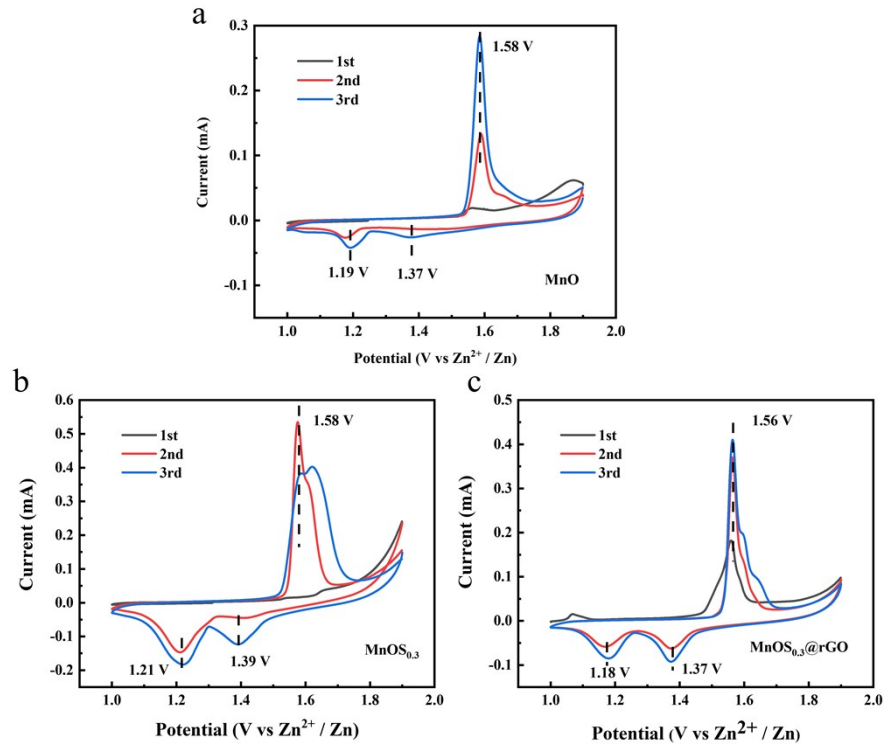

**Fig. 6** (a) MnO CV curves. (Scan rate  $0.1 \text{ mV s}^{-1}$ ) (b)  $\text{MnOS}_{0.3}$  CV curves. (Scan rate  $0.1 \text{ mV s}^{-1}$ ) (c)  $\text{MnOS}_{0.3}@\text{rGO}$  CV curves. (Scan rate  $0.1 \text{ mV s}^{-1}$ )

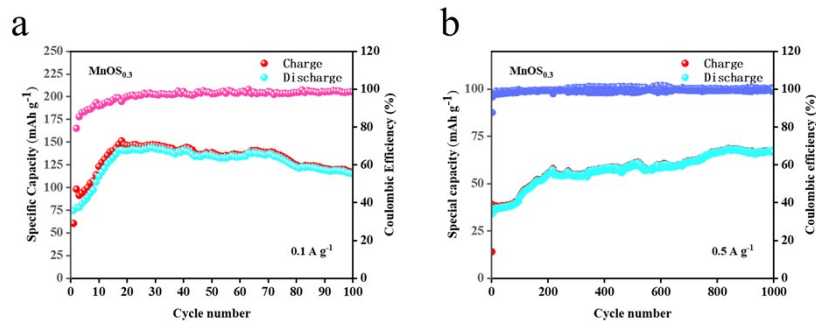

**Fig. 7** Cycling performance at a current density of  $0.5 \text{ A g}^{-1}$  for the  $\text{MnOS}_{0.3}$  electrodes.

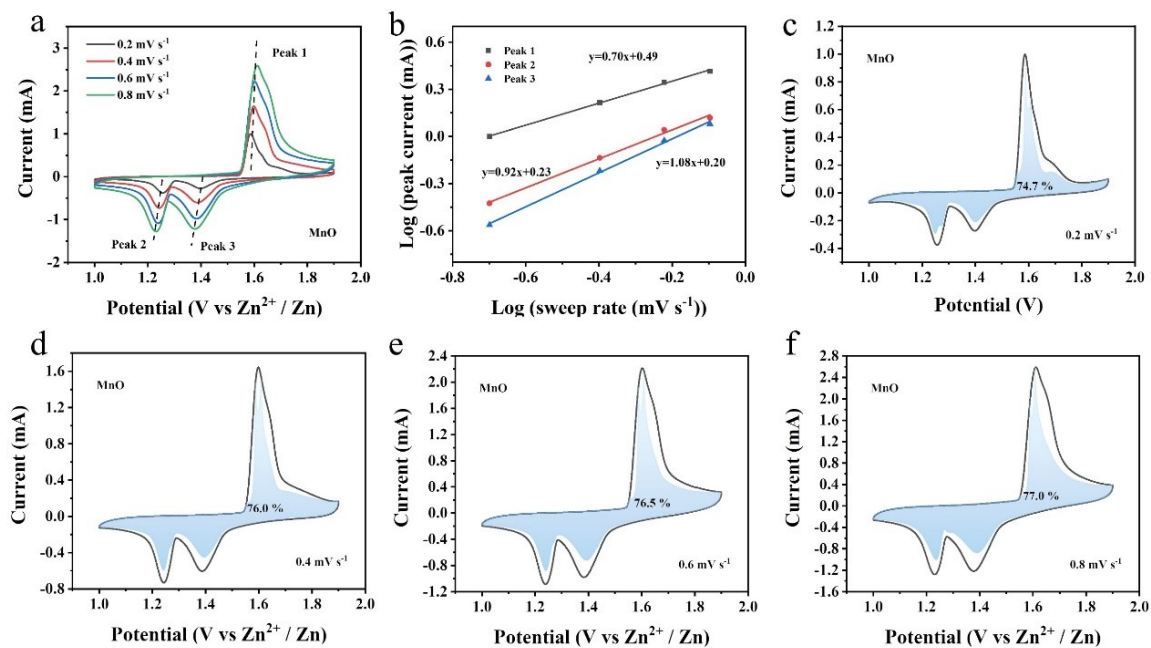

**Fig. 8** MnO curves measured at different scan rates from 0.2 to 0.8  $\text{mV s}^{-1}$ ; *b* value according to the relationship of  $\log(i)$  and  $\log(v)$  at different peaks; Pseudocapacitance contribution at different scanning speeds.

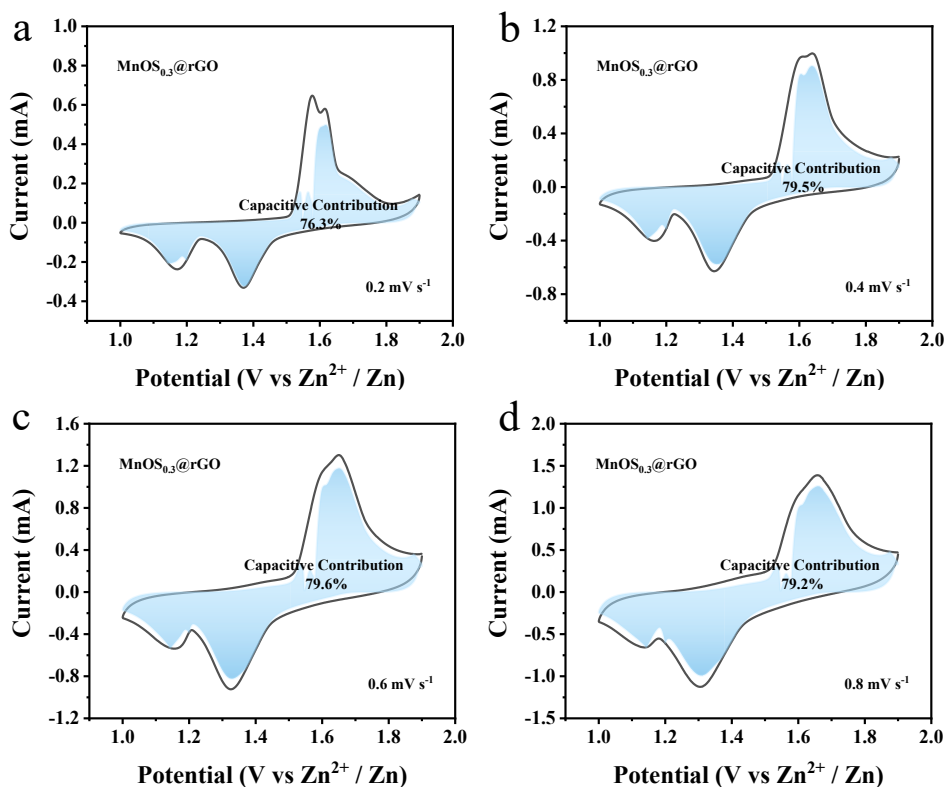

**Fig. 9**  $\text{MnOS}_{0.3}@r\text{GO}$  curves measured at different scan rates from 0.2 to 0.8  $\text{mV s}^{-1}$ ; *b* value according to the relationship of  $\log(i)$  and  $\log(v)$  at different peaks; Pseudocapacitance contribution at different scanning speeds.
